# Supplementary material for: Genome Diversity and Divergence in Drosophila mauritiana: Multiple Signatures of Faster X Evolution
Source: PubMed Central journal article supplement (PMC4202334; doi:10.1093/gbe/evu198), 2014-09-09

## Supplementary materials for

### Genomic diversity and divergence in *Drosophila mauritiana*: multiple signatures of faster X evolution

Daniel Garrigan<sup>1,\*</sup>, Sarah B. Kingan<sup>1</sup>, Anthony J. Geneva<sup>1</sup>, Jeffrey P. Vedanayagam<sup>1</sup>, and Daven C. Presgraves<sup>1</sup>

<sup>1</sup>Department of Biology, University of Rochester, Rochester, New York, USA

\*Corresponding author: [dgarriga@ur.rochester.edu](mailto:dgarriga@ur.rochester.edu)

#### Methods

The Winters *sex-ratio* (SR) is one of three X-linked meiotic drive system in *Drosophila simulans* (Tao Araripe et al. 2007). This system is comprised of a compound drive locus: *Distorter on the X (Dox)* and *Mother of Dox (MDox)* and an autosomal suppressor, *Not much yang (Nmy)*. *Dox* originated as a duplicate copy of *MDox* and *Nmy* is a retrotransposed copy of *Dox* (Tao, Araripe et al. 2007). A functional copy of *Nmy* exists in both *D. simulans* and *D. mauritiana*, and is capable of suppressing drive, indicating that the Winters SR evolved in the *D. simulans* clade ancestor. These genes were previously shown to bear a signature of a selective sweep in *D. simulans* (Kingan et al. 2010). Here we characterize polymorphism at *Dox* and *MDox* in a larger sample of isofemale *D. mauritiana* lines (see main paper methods for collection details) to ask whether the Winters driver may be the target of selection.

Genomic DNA was extracted from single males using a modified protocol of the Wizard Genomic DNA Purification Kit from Promega. Polymerase chain reaction was performed using

Takara LA Taq polymerase following the manufacturer's instructions with a 5 minute extension time. PCR products were cleaned prior to sequencing using exoSAPit (USB). Previously published PCR primers for the *Dox* and *MDox* regions were used, which amplified complete genes as well as flanking sequence (Tao, Araripe, et al. 2007; Tao, Masly, et al. 2007; Kingan, et al. 2010; see supplementary table S14). Internal sequencing primers were designed using Primer3Plus (Untergasser, et al. 2007) and Amplify (Engels 2005); sequences are available upon request. Sequencing was performed on an ABI3730 capillary sequencer according to manufacturer's protocols; sequences were edited using Sequencher v.4.8 (Gene Codes Corp.). Many of the haplotypes from the *Dox* region have a series of identical or nearly identical copies of a 359-bp satellite DNA repeat element (Tao, Araripe, et al. 2007), which is related to the satellite block, *Zhr* (Ferree and Barbash 2009), which complicated the assembly of contigs. We digested the amplified PCR fragments with BslI, and compared the restriction fragment profile with that predicted from our contig to ensure the correct number of repeat elements were included in our alignments. 2× sequencing coverage was obtained for all samples, forward and reverse reads when possible, but in many cases, the lack of unique priming sites due to the tandemly arrayed repeat elements only allowed for 2× coverage in the same direction.

Alignments of sequences for each gene region, as well as between homologous regions of *Dox* and *MDox* were executed by eye using annotated sequence elements as “anchors” for the alignment. In some cases, the bl2seq program of BLAST was used for pair wise alignments (Tatusova and Madden 1999). To insure a proper alignment of each region, we performed a phylogenetic analysis of the 359-bp satellite elements for each gene to assign homology among repeats. For each locus, we extracted the repeat sequences from each sampled isofemale line and aligned the repeats by eye.

## Results

At the *MDox* region, we sample 26 chromosomes and compile a 5,526-bp alignment of the sequences (**supplementary table S16**). We infer that *MDox* is fixed in *D. mauritiana* because all 26 samples contain the gene insertion. We observe copy number variation in the 359-bp satellite elements that flank the *MDox* gene: copy number ranges from one to four tandemly arrayed repeats with most samples having two elements (**supplementary fig. S3**). **Fig. S3b** shows the neighbor-joining tree that was used to create an accurate alignment of the sequenced region (we obtained a similar trees using parsimony, not shown). In addition to the *D. mauritiana* lines sampled in this study, we include 69 previously sequenced *D. simulans* samples (Kingan, et al. 2010). We observe four clusters of repeat sequences with more than 75% bootstrap support and define these as *MDox* repeat types one through four.

At the *Dox* region, we sample the same 26 *D. mauritiana* chromosomes and compile an alignment of 8,503-bp. The ancestral *Dox*[*null*] allele, which lacks the *Dox* gene insertion, is more common than the derived allele, and is found in 20 of the sampled chromosomes (~77%) (Kingan, et al. 2010). One of the sampled strains (*R10*) has a ~3.2-kb deletion that is part of the *Dox* gene. Furthermore, we observe extensive copy number variation in the 359-bp satellite in *D. mauritiana*, with the number of elements ranging from four to seven (**supplementary fig. S2**). **Supplementary fig. S2b** also shows the neighbor-joining tree that was used to assemble an accurate alignment of the *Dox* region for our 26 *D. mauritiana* samples, as well as our previously collected *D. simulans* samples (Kingan, et al. 2010). We observe five clusters of elements with more than 56% bootstrap support and define these as *Dox* repeat types one through five. (No quantitative inferences are made about the evolution of repeat types from these

trees— they are simply used to compile the best alignment of the sequence data by clustering the most closely related repeat elements.)

## Literature Cited

Engels WR. 2005. Amplify. Version 3.14: University of Wisconsin.  
<http://engels.genetics.wisc.edu/amplify/>.

Ferree PM, Barbash DA. 2009. Species-specific heterochromatin prevents mitotic chromosome segregation to cause hybrid lethality in *Drosophila*. PLoS Biol 7:e1000234.

Kingan S, Garrigan D, Hartl D. 2010. Recurrent selection on the Winters *sex-ratio* genes in *Drosophila simulans*. Genetics 184:253-265.

Tao Y, Araripe L, Kingan SB, Ke Y, Xiao H, Hartl DL. 2007. A *sex-ratio* meiotic drive system in *Drosophila simulans*. II: an X-linked distorter. PLoS Biol 5:e293.

Tao Y, Masly JP, Araripe L, Ke Y, Hartl DL. 2007. A *sex-ratio* meiotic drive system in *Drosophila simulans*. I: an autosomal suppressor. PLoS Biol 5:e292.

Tatusova TA, Madden TL. 1999. BLAST 2 Sequences, a new tool for comparing protein and nucleotide sequences. FEMS Microbiol Lett 174:247-250.

Untergasser A, Nijveen H, Rao X, Bisseling T, Geurts R, Leunissen JA. 2007. Primer3Plus, an enhanced web interface to Primer3. Nucleic Acids Res 35:W71-74.

**Table S1**

Statistics describing the *de novo* assembly of the *mau12* genome.

| measure                       | value       |
|-------------------------------|-------------|
| assembly size                 | 124,206,178 |
| number of contigs (> 1000-bp) | 2,759       |
| largest contig                | 2,989,439   |
| N50                           | 542,067     |
| N75                           | 235,193     |

**Table S2**

The number of contigs used to construct the syntenic pseudo-chromosomes. The length of the pseudo-chromosomes does not include any ambiguous bases that were used to fill gaps.

| chromosome | contigs | length (bp) |
|------------|---------|-------------|
| <i>2L</i>  | 123     | 21,521,355  |
| <i>2R</i>  | 151     | 18,987,217  |
| <i>3L</i>  | 120     | 21,693,048  |
| <i>3R</i>  | 59      | 25,652,786  |
| <i>X</i>   | 150     | 17,830,043  |
| total      | 603     | 105,684,449 |

**Table S3**

Details of the libraries sequenced for each strain of *Drosophila*. The penultimate column lists the number of reads mapping to the *mau12* reference genome after quality filtering.

| strain                  | species             | length (bp) | insert (bp) | mapped reads<br>(x10 <sup>6</sup> ) | accession  |
|-------------------------|---------------------|-------------|-------------|-------------------------------------|------------|
| <i>mau12</i>            | <i>mauritiana</i>   | 86          | 200         | 37.311                              | SRR483621  |
|                         | <i>mauritiana</i>   | 100         | 3000        | 122.031                             | n/a        |
| <i>R23</i>              | <i>mauritiana</i>   | 76          | 350         | 57.315                              | n/a        |
|                         | <i>mauritiana</i>   | 76          | 350         | 63.366                              | n/a        |
| <i>R31</i>              | <i>mauritiana</i>   | 76          | 350         | 47.173                              | n/a        |
|                         | <i>mauritiana</i>   | 76          | 350         | 55.987                              | n/a        |
| <i>R32</i>              | <i>mauritiana</i>   | 76          | 350         | 58.338                              | n/a        |
|                         | <i>mauritiana</i>   | 76          | 350         | 66.923                              | n/a        |
| <i>R39</i>              | <i>mauritiana</i>   | 76          | 350         | 55.664                              | n/a        |
|                         | <i>mauritiana</i>   | 76          | 350         | 67.235                              | n/a        |
| <i>R41</i>              | <i>mauritiana</i>   | 76          | 350         | 60.61                               | n/a        |
|                         | <i>mauritiana</i>   | 76          | 350         | 64.477                              | n/a        |
|                         | <i>mauritiana</i>   | 76          | 350         | 61.971                              | n/a        |
| <i>R44</i>              | <i>mauritiana</i>   | 76          | 350         | 61.604                              | n/a        |
|                         | <i>mauritiana</i>   | 76          | 350         | 67.161                              | n/a        |
| <i>R56</i>              | <i>mauritiana</i>   | 76          | 350         | 58.934                              | n/a        |
|                         | <i>mauritiana</i>   | 76          | 350         | 68.625                              | n/a        |
| <i>R61</i>              | <i>mauritiana</i>   | 76          | 350         | 60.55                               | n/a        |
|                         | <i>mauritiana</i>   | 76          | 350         | 62.871                              | n/a        |
|                         | <i>mauritiana</i>   | 76          | 350         | 59.72                               | n/a        |
| <i>R8</i>               | <i>mauritiana</i>   | 76          | 350         | 61.991                              | n/a        |
|                         | <i>mauritiana</i>   | 76          | 350         | 54.09                               | n/a        |
| MD063                   | <i>simulans</i>     | 76          | 350         | 51.55                               | SRR1200800 |
|                         | <i>simulans</i>     | 76          | 350         | 48.003                              | n/a        |
| <i>w</i> <sup>501</sup> | <i>simulans</i>     | 100         | 500         | 37.974                              | SRR520334  |
| <i>y; cn bw; sp</i>     | <i>melanogaster</i> | 146         | 300         | 46.061                              | SRR306626  |
|                         | <i>melanogaster</i> | 146         | 300         | 57.431                              | SRR306627  |
|                         | <i>melanogaster</i> | 146         | 300         | 60.617                              | SRR306628  |

**Table S4**

The 13 strains of *Drosophila* used in this study. Also included are the median read depth for each aligned position and the percent of *mau12* reference genome covered in each of the ten lines of *D. mauritiana*, two lines of *D. simulans*, and the reference strain of *D. melanogaster*, after quality filtering.

| strain                  | species             | depth | % covered |
|-------------------------|---------------------|-------|-----------|
| <i>mau12</i>            | <i>mauritiana</i>   | 125   | 99.48     |
| <i>R23</i>              | <i>mauritiana</i>   | 84    | 98.83     |
| <i>R31</i>              | <i>mauritiana</i>   | 72    | 98.86     |
| <i>R32</i>              | <i>mauritiana</i>   | 87    | 98.84     |
| <i>R39</i>              | <i>mauritiana</i>   | 86    | 98.84     |
| <i>R41</i>              | <i>mauritiana</i>   | 130   | 98.86     |
| <i>R44</i>              | <i>mauritiana</i>   | 89    | 98.80     |
| <i>R56</i>              | <i>mauritiana</i>   | 90    | 98.86     |
| <i>R61</i>              | <i>mauritiana</i>   | 130   | 98.78     |
| <i>R8</i>               | <i>mauritiana</i>   | 81    | 98.86     |
| MD063                   | <i>simulans</i>     | 70    | 98.18     |
| <i>w</i> <sup>501</sup> | <i>simulans</i>     | 34    | 97.91     |
| <i>y; cn bw; sp</i>     | <i>melanogaster</i> | 110   | 94.13     |



**Table S5**

Comparison of counts of genes on the X chromosome (X) and autosomes (A) with significant McDonald-Kreitman tests. Positive (pos.) and negative (neg.) gene categories are genes that show significant departure from neutral expectations in the direction of positive selection (excess nonsynonymous divergence) or negative selection (reduced nonsynonymous divergence), respectively, at the indicated significance cut-off ( $P < 0.05$  or  $P < 0.01$ ). Fisher's Exact Test (FET)  $P$ -value compares X-linked and autosomal counts for significant genes versus all genes tested.

| test        | gene category      | X     | A     | FET $P$ |
|-------------|--------------------|-------|-------|---------|
| polarized   | pos ( $P < 0.05$ ) | 26    | 65    | 0.0011  |
|             | neg ( $P < 0.05$ ) | 4     | 22    | 1.0000  |
| polarized   | pos ( $P < 0.01$ ) | 11    | 12    | 0.0002  |
|             | neg ( $P < 0.01$ ) | 0     | 5     | 1.0000  |
|             | All tested         | 1,690 | 9,349 |         |
| unpolarized | pos ( $P < 0.05$ ) | 60    | 357   | 0.5359  |
|             | neg ( $P < 0.05$ ) | 45    | 222   | 0.5501  |
| unpolarized | pos ( $P < 0.01$ ) | 33    | 111   | 0.0200  |
|             | neg ( $P < 0.01$ ) | 14    | 75    | 1.0000  |
|             | all tested         | 1,757 | 9,523 |         |

**Table S6**

Top Gene Ontology (GO) process, function, and component terms enriched among genes with evidence of recurrent adaptive evolution in the history of the *D. mauritiana* and *D. melanogaster* lineages (unpolarized MK test).

| GO category | description                                                         |
|-------------|---------------------------------------------------------------------|
| Process     |                                                                     |
| GO:0044702  | single organism reproductive process                                |
| GO:0022414  | reproductive process                                                |
| GO:0048610  | cellular process involved in reproduction                           |
| GO:0044767  | single-organism developmental process                               |
| GO:0032502  | developmental process                                               |
| GO:0007276  | gamete generation                                                   |
| GO:0022412  | cellular process involved in reproduction in multicellular organism |
| GO:0032862  | activation of Rho GTPase activity                                   |
| GO:0032863  | activation of Rac GTPase activity                                   |
| GO:0007568  | aging                                                               |
| Function    |                                                                     |
| GO:0003676  | nucleic acid binding                                                |
| GO:0045502  | dynein binding                                                      |
| GO:0004534  | 5'-3' exoribonuclease activity                                      |
| GO:0008574  | plus-end-directed microtubule motor activity                        |
| GO:0003723  | RNA binding                                                         |
| GO:0008270  | zinc ion binding                                                    |
| GO:0003696  | satellite DNA binding                                               |
| GO:0080023  | 3R-hydroxyacyl-CoA dehydratase activity                             |
| GO:0008409  | 5'-3' exonuclease activity                                          |
| Component   |                                                                     |
| GO:0044611  | nuclear pore inner ring                                             |
| GO:0038201  | TOR complex                                                         |
| GO:0032991  | macromolecular complex                                              |
| GO:0044427  | chromosomal part                                                    |
| GO:0044428  | nuclear part                                                        |
| GO:0005737  | cytoplasm                                                           |
| GO:0043228  | non-membrane-bounded organelle                                      |
| GO:0043232  | intracellular non-membrane-bounded organelle                        |

**Table S7**

Top Gene Ontology (GO) process, function, and component terms enriched among genes with histories of recurrent adaptive evolution in the *D. mauritiana* lineage (polarized MK test).

| GO category | description                                                         |
|-------------|---------------------------------------------------------------------|
| Process     |                                                                     |
| GO:0007276  | gamete generation                                                   |
| GO:0000184  | nuclear-transcribed mRNA catabolic process, nonsense-mediated decay |
| GO:0016071  | mRNA metabolic process                                              |
| GO:0030727  | germarium-derived female germ-line cyst formation                   |
| GO:0048135  | female germ-line cyst formation                                     |
| GO:0016070  | RNA metabolic process                                               |
| GO:0000956  | nuclear-transcribed mRNA catabolic process                          |
| GO:0010629  | negative regulation of gene expression                              |
| GO:0006402  | mRNA catabolic process                                              |
| GO:0000291  | nuclear-transcribed mRNA catabolic process, exonucleolytic          |
| Function    |                                                                     |
| GO:0009055  | electron carrier activity                                           |
| GO:0003696  | satellite DNA binding                                               |
| GO:0017056  | structural constituent of nuclear pore                              |
| GO:0004532  | exoribonuclease activity                                            |
| GO:0016896  | exoribonuclease activity, producing 5'-phosphomonoesters            |
| Component   |                                                                     |
| GO:0005700  | polytene chromosome                                                 |
| GO:0043228  | non-membrane-bounded organelle                                      |
| GO:0043232  | intracellular non-membrane-bounded organelle                        |
| GO:0005604  | basement membrane                                                   |
| GO:0000151  | ubiquitin ligase complex                                            |
| GO:0044420  | extracellular matrix part                                           |
| GO:0031461  | cullin-RING ubiquitin ligase complex                                |
| GO:0005694  | chromosome                                                          |
| GO:0044428  | nuclear part                                                        |
| GO:0044427  | chromosomal part                                                    |
| GO:0044451  | nucleoplasm part                                                    |
| GO:0044611  | nuclear pore inner ring                                             |

**Table S8**

Mean and median values of *D. mauritiana* nucleotide diversity ( $\pi$ ) calculated for the 152 10-kb windows from SweepFinder with  $P < 0.05$  and 152 randomly drawn windows sorted by chromosome.  $P$ -values are the probability that SweepFinder windows have lower  $\pi$  based on 1000 bootstrap resampling replicates.

| chrom     | n windows | SweepFinder windows |        | random windows |          |          | $P$ -value |
|-----------|-----------|---------------------|--------|----------------|----------|----------|------------|
|           |           | mean                | median | mean           | 0.025 CI | 0.975 CI |            |
| <i>2L</i> | 56        | 0.0051              | 0.0028 | 0.0143         | 0.0123   | 0.0201   | < 0.001    |
| <i>2R</i> | 19        | 0.0071              | 0.0054 | 0.0127         | 0.0112   | 0.0147   | < 0.001    |
| <i>3L</i> | 10        | 0.0068              | 0.0062 | 0.0139         | 0.0115   | 0.0162   | < 0.001    |
| <i>3R</i> | 6         | 0.0060              | 0.0059 | 0.0125         | 0.0101   | 0.0152   | < 0.001    |
| <i>X</i>  | 61        | 0.0023              | 0.0018 | 0.0085         | 0.0077   | 0.0093   | < 0.001    |
| aut.      | 91        | 0.0057              | 0.0041 | 0.0138         | 0.0124   | 0.0174   | < 0.001    |

**Table S9**

Mean and median values of sequence divergence from *D. melanogaster* (average pairwise Jukes-Cantor divergence) calculated for the 152 10-kb windows from SweepFinder with  $P < 0.05$  and 152 randomly drawn windows sorted by chromosome.  $P$ -values are the probability that SweepFinder windows have higher divergence based on 1000 bootstrap resampling replicates.

| chrom     | n windows | SweepFinder windows |        | random windows |          |          | $P$ -value |
|-----------|-----------|---------------------|--------|----------------|----------|----------|------------|
|           |           | mean                | median | mean           | 0.025 CI | 0.975 CI |            |
| <i>2L</i> | 56        | 0.0623              | 0.0617 | 0.0425         | 0.0406   | 0.0445   | < 0.001    |
| <i>2R</i> | 19        | 0.0563              | 0.0564 | 0.0410         | 0.0378   | 0.0444   | < 0.001    |
| <i>3L</i> | 10        | 0.0407              | 0.0413 | 0.0417         | 0.0371   | 0.0468   | 0.592      |
| <i>3R</i> | 6         | 0.0493              | 0.0465 | 0.0410         | 0.0358   | 0.0470   | 0.013      |
| <i>X</i>  | 61        | 0.0535              | 0.0547 | 0.0457         | 0.0438   | 0.0477   | < 0.001    |
| aut.      | 91        | 0.0577              | 0.0566 | 0.0420         | 0.0405   | 0.0435   | < 0.001    |

**Table S10**

Mean and median values of Tajima's  $D$  ( $TD$ ) for *D. mauritiana* calculated for the 152 10-kb windows from SweepFinder with  $P < 0.05$  and 152 randomly drawn windows sorted by chromosome.  $P$ -values are the probability that SweepFinder windows have lower  $TD$  based on 1000 bootstrap resampling replicates.

| chrom     | n windows | SweepFinder windows |         | random windows |          |          | $P$ -value |
|-----------|-----------|---------------------|---------|----------------|----------|----------|------------|
|           |           | mean                | median  | mean           | 0.025 CI | 0.975 CI |            |
| <i>2L</i> | 56        | -0.1811             | -0.1079 | -0.2887        | -0.3500  | -0.2298  | 0.005      |
| <i>2R</i> | 19        | -0.2784             | -0.3205 | -0.4331        | -0.5409  | -0.3217  | 0.013      |
| <i>3L</i> | 10        | -0.3823             | -0.3602 | -0.2211        | -0.3803  | -0.0460  | 0.952      |
| <i>3R</i> | 6         | -0.6639             | -0.6393 | -0.3917        | -0.5832  | -0.1801  | 0.988      |
| <i>X</i>  | 61        | -0.4690             | -0.5440 | -0.5298        | -0.5991  | -0.4541  | 0.079      |
| aut.      | 91        | -0.2553             | -0.2309 | -0.3181        | -0.3684  | -0.2677  | 0.024      |

**Table S11**

Mean and median values of  $Z_{nS}$  (average pairwise  $r^2$ ) for *D. mauritiana* calculated for the 152 10-kb windows from SweepFinder with  $P < 0.05$  and 152 randomly drawn windows sorted by chromosome.  $P$ -values are the probability that SweepFinder windows have higher  $Z_{nS}$  based on 1000 bootstrap resampling replicates.

| chrom     | n windows | SweepFinder windows |        | random windows |          |          | $P$ -value |
|-----------|-----------|---------------------|--------|----------------|----------|----------|------------|
|           |           | mean                | median | mean           | 0.025 CI | 0.975 CI |            |
| <i>2L</i> | 56        | 0.1647              | 0.1490 | 0.1364         | 0.1321   | 0.1417   | < 0.001    |
| <i>2R</i> | 19        | 0.1333              | 0.1324 | 0.1245         | 0.1200   | 0.1310   | 0.024      |
| <i>3L</i> | 10        | 0.1391              | 0.1408 | 0.1371         | 0.1292   | 0.1484   | 0.270      |
| <i>3R</i> | 6         | 0.1730              | 0.1343 | 0.1310         | 0.1210   | 0.1437   | 0.006      |
| <i>X</i>  | 61        | 0.2113              | 0.1457 | 0.1283         | 0.1223   | 0.1393   | < 0.001    |
| aut.      | 91        | 0.1559              | 0.1419 | 0.1336         | 0.1302   | 0.1374   | < 0.001    |

**Table S12**

Polymorphism in the four genes in the putative sweep region X:16800000-17100000. Four nonsynonymous mutations are present and only three of those have arisen exclusively in the *D. mauritiana* lineage (one in the *CG32553* gene and two in the *CG43133* gene).

| gene         | <i>wup-A</i> | <i>CG32553</i> |             | <i>CG43133</i> |     |     |     |     | <i>ari-1</i> |     |     |
|--------------|--------------|----------------|-------------|----------------|-----|-----|-----|-----|--------------|-----|-----|
| codon        | 133          | 27             | 35          | 26             | 31  | 47  | 60  | 95  | 102          | 127 | 380 |
| <i>mel</i>   | GAT          | GCA            | AAG         | TTG            | TAT | GCC | TTA | ATC | ACT          | TCA | AAC |
| <i>sim</i>   | ...          | ...            | CG.         | ...            | ... | ... | ... | ... | ...          | ... | ... |
| <i>R8</i>    | ..C          | .T.            | C..         | C..            | ..C | ..A | A.. | ..G | ..A          | ..G | ..T |
| <i>mau12</i> | ..C          | .T.            | C..         | C..            | ..C | ..A | A.. | ..G | ..A          | ..G | ..T |
| <i>R23</i>   | ..C          | .T.            | C..         | C..            | ..C | ..A | A.. | ..G | ..A          | ..G | ..T |
| <i>R31</i>   | ...          | .T.            | C..         | C..            | ..C | ..A | A.. | ..G | ..A          | ..G | ..T |
| <i>R32</i>   | ..C          | .T.            | C..         | C..            | ..C | ..A | A.. | ..G | ..A          | ..G | ..T |
| <i>R39</i>   | ...          | .T.            | C..         | C..            | ..C | ..A | A.. | ..G | ..A          | ..G | ..T |
| <i>R41</i>   | ..C          | .T.            | C..         | C..            | ..C | ..A | A.. | ..G | ..A          | ..G | ..T |
| <i>R44</i>   | ..C          | .T.            | C..         | C..            | ..C | ..A | A.. | ..G | ..A          | ..G | ..T |
| <i>R56</i>   | ..C          | .T.            | C..         | C..            | ..C | ..A | A.. | ..G | ..A          | ..G | ..T |
| <i>R61</i>   | ..C          | .T.            | C..         | C..            | ..C | ..A | A.. | ..G | ..A          | ..G | ..T |
| Change       | syn          | non            | non         | syn            | syn | syn | non | non | syn          | syn | syn |
| Amino Acid   | D            | A→V            | K→Q<br>Q→R* | I              | Y   | A   | L→I | I→M | T            | S   | N   |

\*First nonsynonymous substitution occurred in *simulans* clade ancestor, second substitution in the *D. simulans* lineage.



**Table S13**

Percent masked sequence by chromosome arm for seven different repeat classes.

| repeat class    | <i>2L</i> | <i>2R</i> | <i>3L</i> | <i>3R</i> | <i>X</i> |
|-----------------|-----------|-----------|-----------|-----------|----------|
| LINES           | 0.0061    | 0.0087    | 0.0061    | 0.0029    | 0.0047   |
| LTR elements    | 0.0097    | 0.0104    | 0.0064    | 0.0017    | 0.0023   |
| DNA transposons | 0.0043    | 0.0037    | 0.0028    | 0.0015    | 0.0026   |
| unclassified    | 0.0076    | 0.0079    | 0.0061    | 0.0039    | 0.0065   |
| satellites      | 0.0005    | 0.0004    | 0.0003    | 0.0005    | 0.0052   |
| simple repeats  | 0.0174    | 0.0211    | 0.0215    | 0.0230    | 0.0354   |
| low complexity  | 0.0027    | 0.0028    | 0.0032    | 0.0031    | 0.0051   |

**Table S14**

Identity of satellite DNA repeats present in block X.1 (see **fig. 3** from main text).

| satellite  | count | mean divergence |
|------------|-------|-----------------|
| Sim359     | 45    | 15%             |
| SAR_DM     | 26    | 20%             |
| SAR2_DM    | 14    | 20%             |
| SAT-1_Dsim | 1     | 20%             |

## Table S15

The sequences of PCR primers used to amplify the Winters *sex-ratio* genes in *D. mauritiana*.

| name                           | sequence                          |
|--------------------------------|-----------------------------------|
| CG32702_SR6_F1 ( <i>MDox</i> ) | GTAACGATGTGTACGCGCTTTGAGGTG       |
| CG32702_SR6_R1 ( <i>MDox</i> ) | GGTCGCGGATTCACATTGCTCTATAACC      |
| DoxF4                          | AAGCAGTTCCCAAAGAAAGAGAGCAGAGCAACT |
| DoxR4                          | CCAGCTCAAACCACAGGGAGACTGTACATA    |

**Table S16***Drosophila mauritiana* strains sequences in this study.

| strain         | <i>Dox</i> genotype | <i>MDox</i> genotype |
|----------------|---------------------|----------------------|
| <i>mau12</i> * | <i>Dox</i> [null]   | <i>MDox</i>          |
| <i>R2</i>      | <i>Dox</i>          | <i>MDox</i>          |
| <i>R3</i>      | <i>Dox</i> [null]   | <i>MDox</i>          |
| <i>R4</i>      | <i>Dox</i> [null]   | <i>MDox</i>          |
| <i>R6</i>      | <i>Dox</i> [null]   | <i>MDox</i>          |
| <i>R7</i>      | <i>Dox</i>          | <i>MDox</i>          |
| <i>R8</i> *    | <i>Dox</i> [null]   | <i>MDox</i>          |
| <i>R9</i>      | <i>Dox</i>          | <i>MDox</i>          |
| <i>R10</i>     | <i>Dox</i> [del]**  | <i>MDox</i>          |
| <i>R11</i>     | <i>Dox</i> [null]   | <i>MDox</i>          |
| <i>R12</i>     | <i>Dox</i> [null]   | <i>MDox</i>          |
| <i>R13</i>     | <i>Dox</i> [null]   | <i>MDox</i>          |
| <i>R16</i>     | <i>Dox</i>          | <i>MDox</i>          |
| <i>R17</i>     | <i>Dox</i>          | <i>MDox</i>          |
| <i>R18</i>     | <i>Dox</i> [null]   | <i>MDox</i>          |
| <i>R19</i>     | <i>Dox</i> [null]   | <i>MDox</i>          |
| <i>R20</i>     | <i>Dox</i> [null]   | <i>MDox</i>          |
| <i>R22</i>     | <i>Dox</i> [null]   | <i>MDox</i>          |
| <i>R23</i> *   | <i>Dox</i> [null]   | <i>MDox</i>          |
| <i>R26</i>     | <i>Dox</i> [null]   | <i>MDox</i>          |
| <i>R27</i>     | <i>Dox</i> [null]   | <i>MDox</i>          |
| <i>R30</i>     | <i>Dox</i> [null]   | <i>MDox</i>          |
| <i>R31</i> *   | <i>Dox</i> [null]   | <i>MDox</i>          |
| <i>R32</i> *   | <i>Dox</i> [null]   | <i>MDox</i>          |
| <i>R35</i>     | <i>Dox</i> [null]   | <i>MDox</i>          |
| <i>R38</i>     | <i>Dox</i> [null]   | <i>MDox</i>          |
| <i>R39</i> *   | <i>Dox</i> [null]   | <i>MDox</i>          |

\*Present in the population genomic dataset.

\*\*See **fig. S3** and supplementary text.

## Supplementary Figure Legends

**FIG. S1.**— Distribution of the average pairwise nucleotide distance ( $\pi$ ), the average Jukes-Cantor corrected distance from *D. melanogaster* ( $d_{\text{mel}}$ ), and the summary of the site frequency spectrum, Tajima's  $D$  ( $TD$ ), by chromosome for the whole genome (10-kb windows) and five different sequences classes. Box plots that are different colors have significantly different distributions (Mann-Whitney  $U$ ,  $P < 0.05$  after correcting for 10 pairwise comparisons).

**FIG. S2.**— Illustration of the alignment of *Dox* locus for *D. mauritiana* (above) and *D. simulans* (below). The 359-bp satellite DNA repeats are shown as rectangles. The colors correspond to repeat types based on the phylogenetic analysis; grey repeat types are present in only *Dox[null]* haplotypes of *D. simulans* and do not form a distinct clade (Panel B). “Type Sample” refers to the identity of one of the isofemale lines with the haplotype shown. Frequency is the number of times the haplotype appears in the sample. Length is the total length of the sequenced haplotype, which included repeats and flanking sequence. The *Dox* insertion is shown as a black triangle and is not drawn to scale. Gaps introduced into the alignment are shown as dashed lines. B) Bootstrap consensus neighbor-joining tree based on Jukes-Cantor genetics distance. The tree is rooted with *D. melanogaster* repeat elements from the *Dox* locus. Numbers at nodes are bootstrap values (values not shown are less than 40). Colors indicate repeat types as in Figure 3.4. “Tu” samples are *D. simulans*, “R” samples are *D. mauritiana*. Repeat elements for each sample are numbered in order (e.g., “R8 rep 7” and “R3 rep 5” are homologous and are both type 5 shown as purple). Repeat elements that contain the *Dox* insertion were concatenated and are indicated with an asterisk.

**FIG. S3.**— Illustrative alignment of the *MDox* locus for *D. mauritiana* (above) and *D. simulans* (below). The 359-bp satellite DNA repeats are shown as rectangles. Colors correspond to repeat

types based on the phylogenetic analysis; grey repeat types are present in only *MDox[null]* haplotypes of *D. simulans* and do not form a distinct clade (Panel B). “Type Sample” refers to the identity of one of the isofemale lines with the haplotype shown. Frequency is the number of times the haplotype appears in the sample. Length is the total length of the sequenced haplotype. The *MDox* insertion is shown as a black triangle and is not drawn to scale. Gaps introduced into the alignment are shown as dashed lines. B) Bootstrap consensus neighbor-joining tree based on Jukes-Cantor genetics distance. The tree is rooted with *D. melanogaster* repeat elements from the *Dox* locus. Numbers at nodes are bootstrap values (values not shown are less than 40). Colors indicate repeat type as in Panel A. “Tu” samples are *D. simulans*, “R” samples are *D. mauritiana*. Repeat elements for each sample are numbered in order (e.g., “R18 rep 4” and “R6 rep 2” are homologous and are both type 4, shown as blue). Repeat elements that contain the *MDox* insertion were concatenated (i.e., the *MDox* insertion was excised) and are denoted with an asterisk.

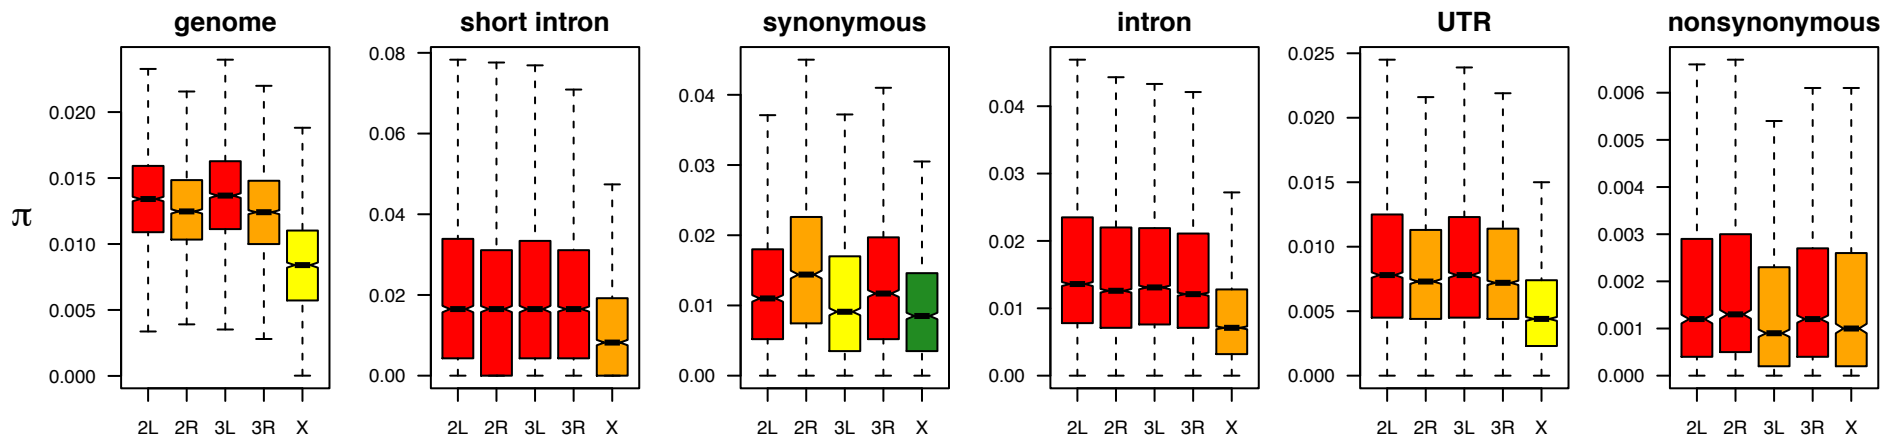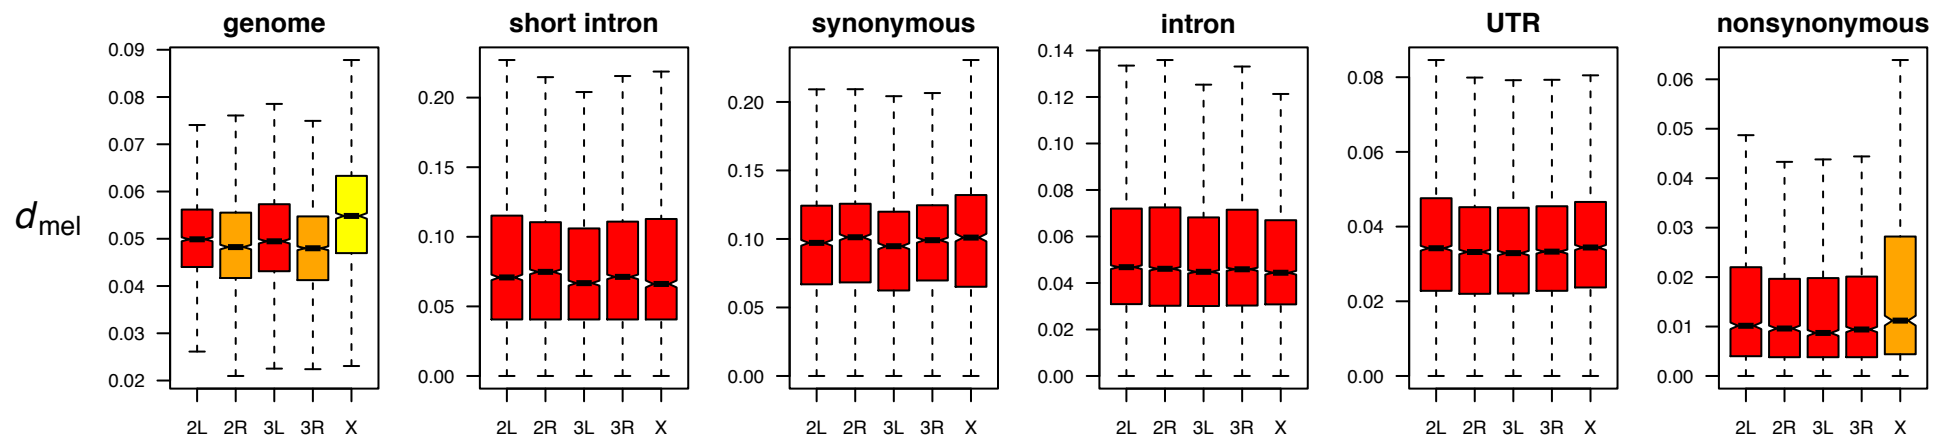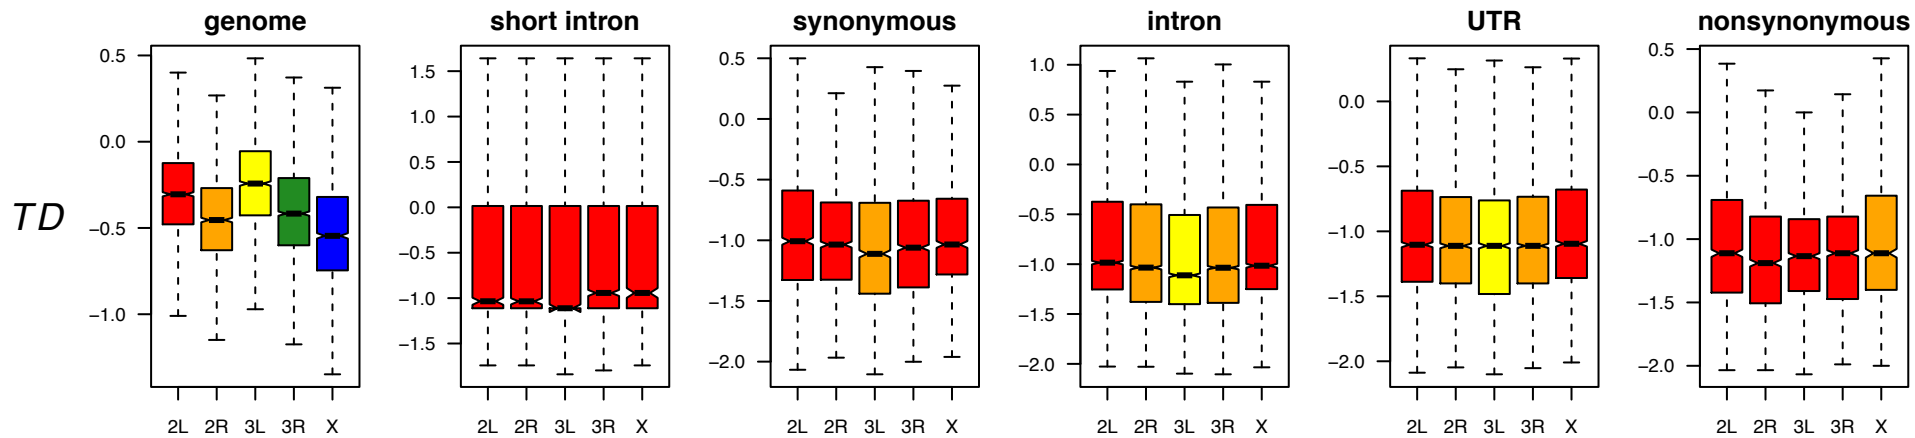

| Type                 | Sample | Frequency | Number of Repeats | Length (bp) | Type 1 | Type 2 | Type 3 | Type 4 | Type 5 |
|----------------------|--------|-----------|-------------------|-------------|--------|--------|--------|--------|--------|
| <i>D. mauritiana</i> | R8     | 4         | 7                 | 3830        |        |        |        |        |        |
|                      | R6     | 5         | 6                 | 3471        |        |        |        |        |        |
|                      | R3     | 4         | 5                 | 3112        |        |        |        |        |        |
|                      | R27    | 2         | 5                 | 3141        |        |        |        |        |        |
|                      | R31    | 1         | 5                 | 3162        |        |        |        |        |        |
|                      | R22    | 2         | 4                 | 2753        |        |        |        |        |        |
|                      | R20    | 1         | 4                 | 2801        |        |        |        |        |        |
|                      | R26    | 1         | 4                 | 2405        |        |        |        |        |        |
|                      | R2     | 1         | 7                 | 7027        |        |        |        |        |        |
|                      | R16    | 1         | 7                 | 7166        |        |        |        |        |        |
| R9                   | 1      | 5         | 6355              |             |        |        |        |        |        |
| R10                  | 1      | 5         | 3778              |             |        |        |        |        |        |
| R7                   | 2      | 4         | 5667              |             |        |        |        |        |        |
| <i>D. simulans</i>   | Tu9    | 67        | 4                 | 6062        |        |        |        |        |        |
|                      | Tu07   | 1         | 3                 | 2410        |        |        |        |        |        |
|                      | Tu196  | 2         | 3                 | 2397        |        |        |        |        |        |
|                      | Tu198  | 1         | 3                 | 2410        |        |        |        |        |        |

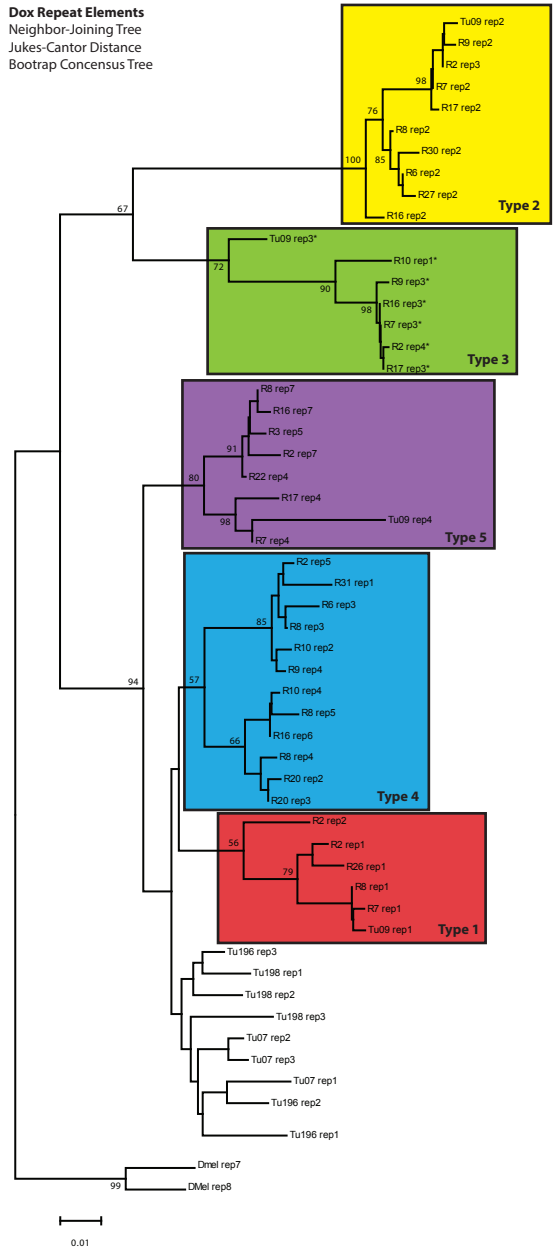



|                      | Type Sample | Frequency | Number of Repeats | Length (bp) | Type 1 | Type 2 | Type 3 | Type 4 |
|----------------------|-------------|-----------|-------------------|-------------|--------|--------|--------|--------|
| <i>D. mauritiana</i> | R18         | 1         | 4                 | 5260        |        |        |        |        |
|                      | R20         | 1         | 4                 | 5152        |        |        |        |        |
|                      | R6          | 23        | 2                 | 4544        |        |        |        |        |
|                      | R19         | 1         | 1                 | 4179        |        |        |        |        |
| <i>D. simulans</i>   | Tu9         | 65        | 2                 | 4508        |        |        |        |        |
|                      | Tu07        | 1         | 3                 | 3618        |        |        |        |        |
|                      | Tu184       | 1         | 3                 | 3604        |        |        |        |        |
|                      | Tu196       | 1         | 2                 | 3349        |        |        |        |        |
|                      | Tu197       | 1         | 1                 | 2845        |        |        |        |        |

**MDox Repeat Elements**  
Neighbor-Joining Tree  
Jukes-Cantor Distance  
Bootstrap Concensus Tree

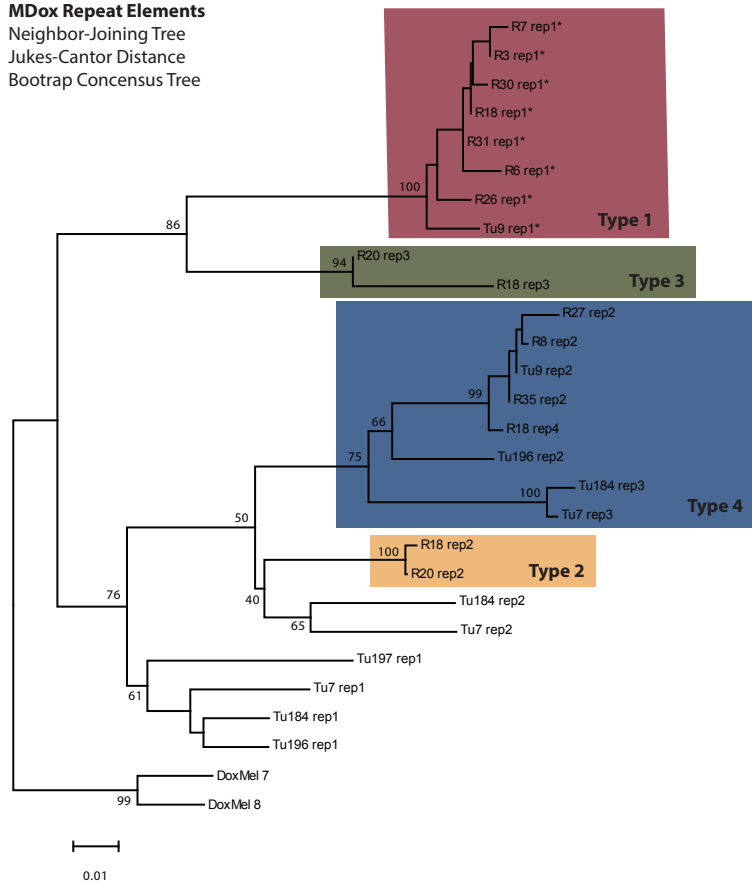

Supplement: supp_evu198_Supplementary_Material.pdf [file supp_evu198_Supplementary_Material.pdf]
